# Supplementary material for: Perfusion Magnetic Resonance Imaging Changes in Normal Appearing Brain Tissue after Radiotherapy in Glioblastoma Patients may Confound Longitudinal Evaluation of Treatment Response
Source: PubMed Central journal article supplement — Radiol Oncol. 2018 Jun 6;52(2):143–51. doi: 10.2478/raon-2018-0022 (PMC6043875; doi:10.2478/raon-2018-0022), 2018-06-06
Supplement: raon-52-143_SM.pdf [file raon-52-143_SM.pdf]

# Perfusion magnetic resonance imaging changes in normal appearing brain tissue after radiotherapy in glioblastoma patients may confound longitudinal evaluation of treatment response

Markus Fahlström, Erik Blomquist, Tufve Nyholm, Elna-Marie Larsson

doi: 10.2478/raon-2018-0022

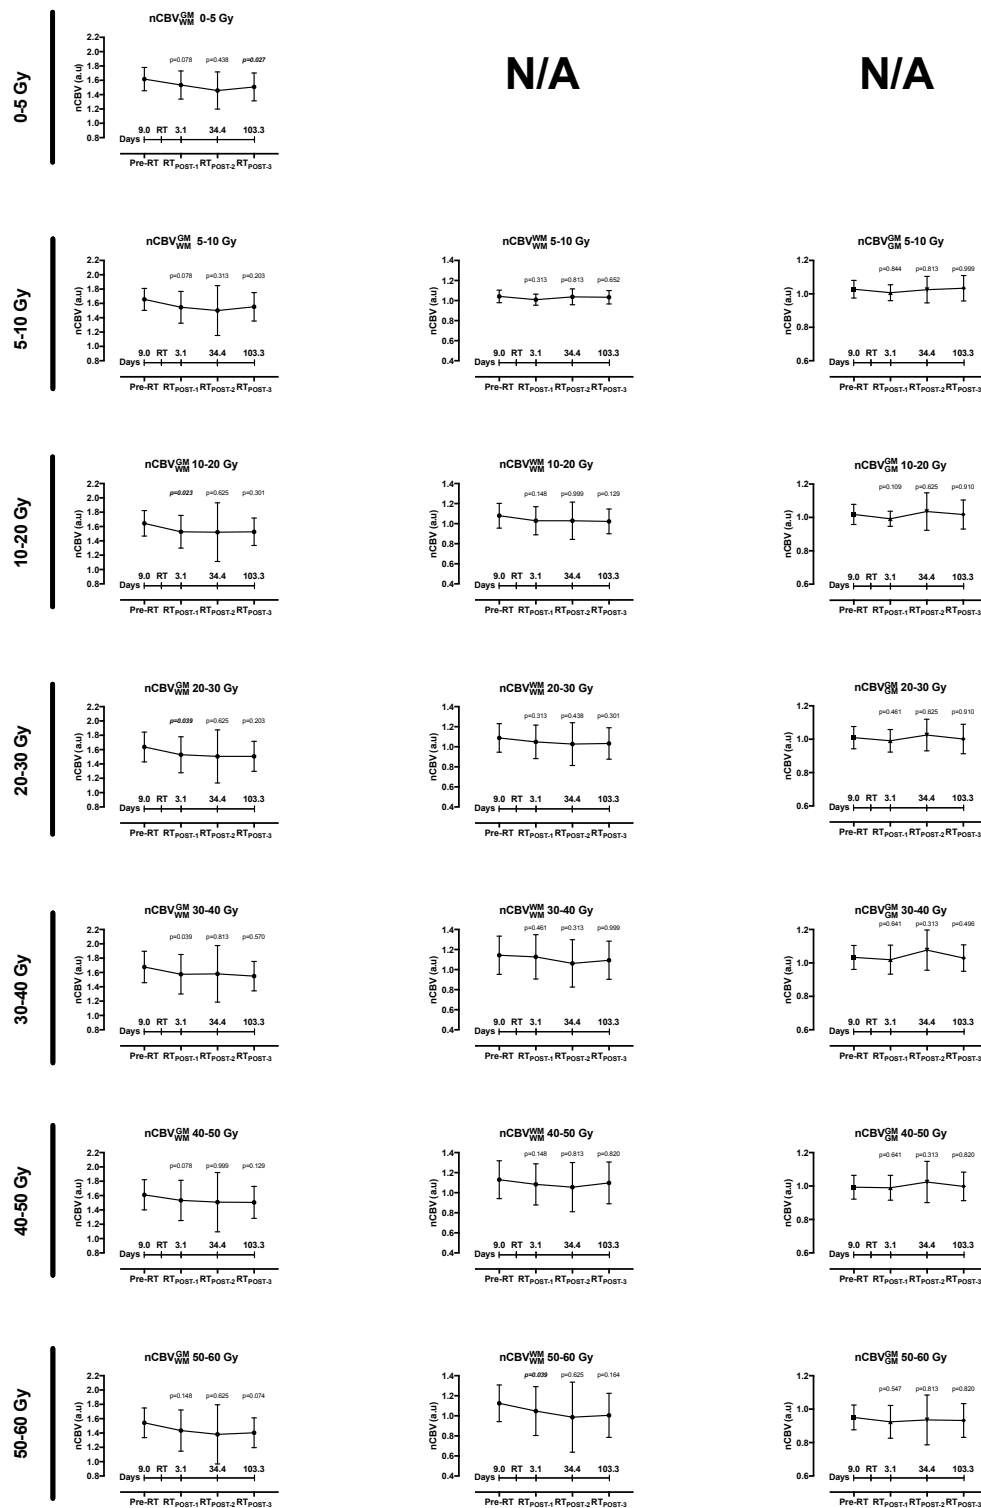

S1 FIGURE. Longitudinal change in regional nCBV. Regional nCBV (mean and 95% CI) graphically displayed for the different examinations in consecutive order. Derived P-values are included, and emphasised in bold and italics if less than 0.05.

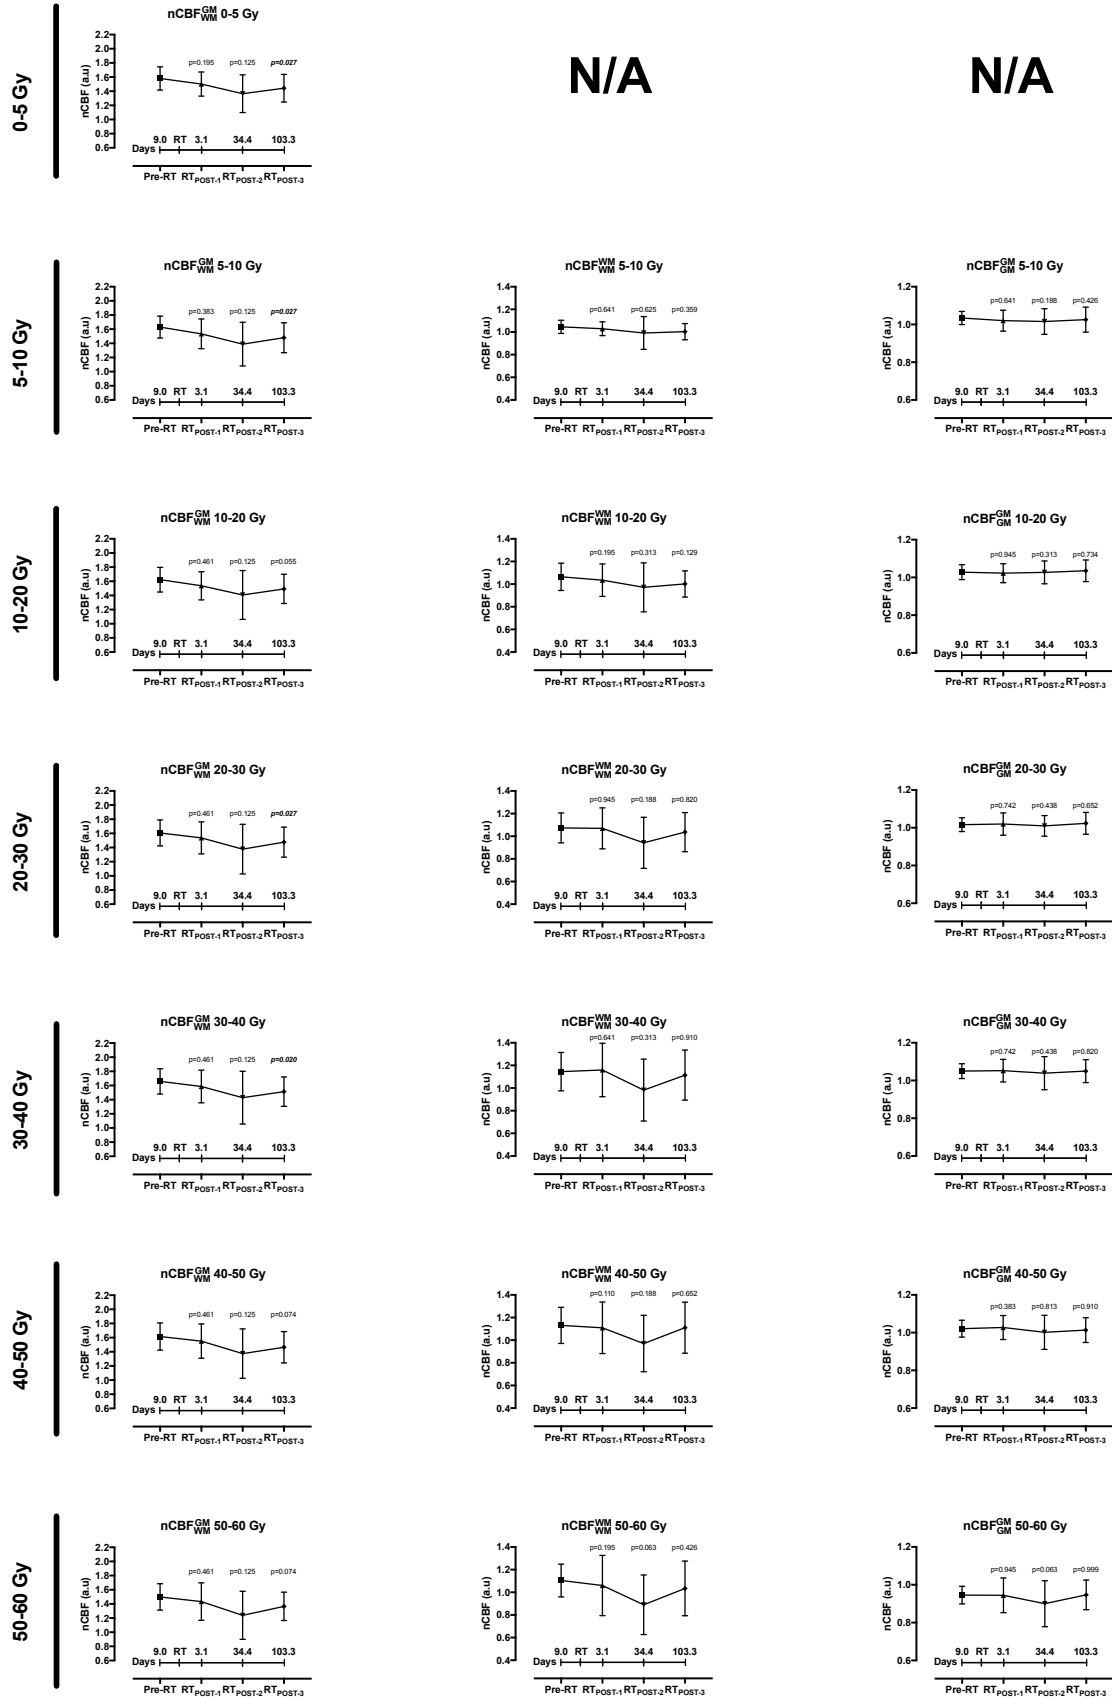

52 FIGURE. Longitudinal change in regional nCBF. Regional nCBF (mean and 95% CI) graphically displayed for the different examinations in consecutive order. Derived P-values are included, and emphasized in bold and italics if less than 0.05.

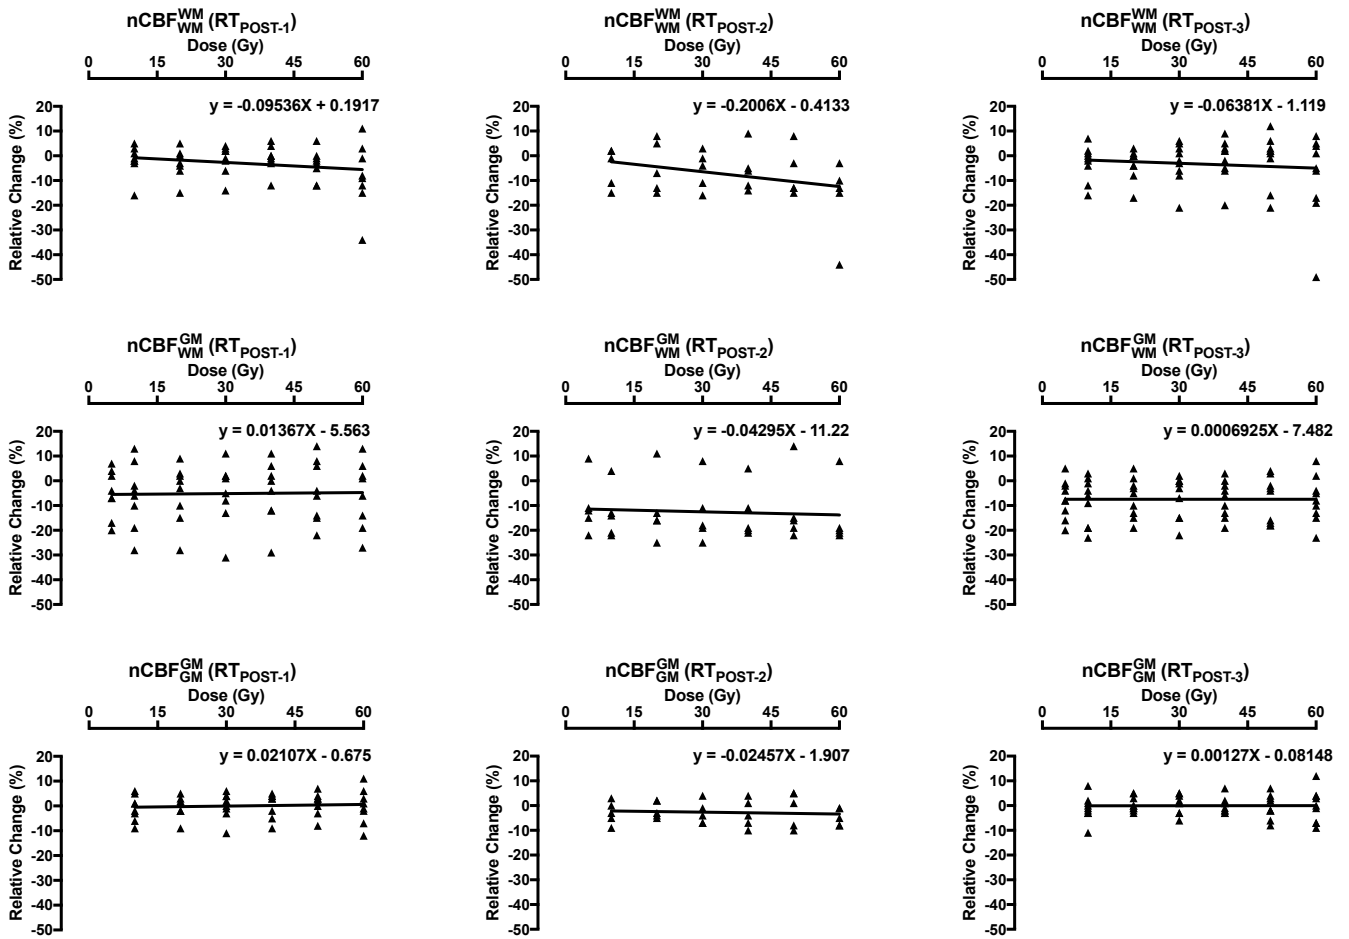

**S3 FIGURE.** Dose-dependent relative change and linear regression model for nCBF. Shows regional relative change for nCBF and derived line regression (line and equation).

**S1 TABLE.** Volumes for derived dose regions. Mean volume in cm<sup>3</sup> with 95% confident interval for the derived dose regions.

| Dose Region | Volume (cm <sup>3</sup> ) Mean (95% CI) |                   |
|-------------|-----------------------------------------|-------------------|
|             | GM                                      | WM                |
| 0-5 Gy      | 84.5 (74.5-94.5)                        | 56.0 (47.1-64.8)  |
| 5-10 Gy     | 36.4 (27.5-45.2)                        | 33.4 (24.3-42.4)  |
| 10-20 Gy    | 62.7 (54.8-70.6)                        | 51.5 (43.5-59.6)  |
| 20-30 Gy    | 91.0 (81.0-101.1)                       | 73.7 (65.1-82.4)  |
| 30-40 Gy    | 35.0 (31.9-38.2)                        | 32.3 (29.0-35.7)  |
| 40-50 Gy    | 28.2 (24.1-34.2)                        | 19.7 (18.2-21.2)  |
| 50-60 Gy    | 117.3 (106.7-127.8)                     | 90.2 (78.4-102.0) |

**S2 TABLE.** Mean and SEM for regional nCBV and nCBF. Regional nCBV and nCBF (mean and SEM), decrease in percentage relative Pre-FRT (mean and SD) and derived *P*-values.

| nCBV <sub>WM</sub> <sup>GM</sup> |           |             |               |             | nCBV <sub>WM</sub> <sup>WM</sup> |          |           |             |             | nCBV <sub>GM</sub> <sup>GM</sup> |              |           |           |             |             |             |             |
|----------------------------------|-----------|-------------|---------------|-------------|----------------------------------|----------|-----------|-------------|-------------|----------------------------------|--------------|-----------|-----------|-------------|-------------|-------------|-------------|
|                                  | Pre-RT    | Post-RT 1   | Post-RT 2     | Post-RT 3   |                                  | Pre-RT   | Post-RT 1 | Post-RT 2   | Post-RT 3   |                                  | Pre-RT       | Post-RT 1 | Post-RT 2 | Post-RT 3   |             |             |             |
| 0-5 Gy                           | nCBV      | 1.62 ± 0.07 | 1.53 ± 0.08   | 1.37 ± 0.09 | 1.51 ± 0.08                      | 5-10 Gy  | nCBV      | 1.04 ± 0.03 | 1.01 ± 0.02 | 1.04 ± 0.03                      | 1.03 ± 0.03  | 5-10 Gy   | nCBV      | 1.03 ± 0.02 | 1.01 ± 0.02 | 1.03 ± 0.03 | 1.03 ± 0.03 |
|                                  | ΔnCBV (%) |             | -6.0 ± 7.3    | -6.2 ± 14.7 | -5.6 ± 9.1                       |          | ΔnCBV (%) |             | -3.5 ± 7.1  | 2.0 ± 10.1                       | 0.2 ± 7.7    |           | ΔnCBV (%) |             | -0.4 ± 3.2  | 0.0 ± 5.1   | -0.2 ± 4.7  |
|                                  | p-value   |             | 0,0781        | 0,4375      | 0,0742                           |          | p-value   |             | 0,3125      | 0,8125                           | 0,6523       |           | p-value   |             | 0,8438      | 0,8125      | >0,9999     |
| 5-10 Gy                          | nCBV      | 1.66 ± 0.07 | 1.55 ± 0.09   | 1.50 ± 0.13 | 1.55 ± 0.09                      | 10-20 Gy | nCBV      | 1.08 ± 0.05 | 1.03 ± 0.06 | 1.03 ± 0.07                      | 1.02 ± 0.05  | 10-20 Gy  | nCBV      | 1.02 ± 0.03 | 0.99 ± 0.02 | 1.03 ± 0.04 | 1.02 ± 0.04 |
|                                  | ΔnCBV (%) |             | -6.3 ± 8.5    | -6.2 ± 11.0 | -5.8 ± 9.2                       |          | ΔnCBV (%) |             | -4.1 ± 7.2  | 1.2 ± 10.9                       | -2.9 ± 6.8   |           | ΔnCBV (%) |             | -1.4 ± 2.1  | 1.4 ± 3.0   | -0.4 ± 8.3  |
|                                  | p-value   |             | 0,0781        | 0,3125      | 0,2031                           |          | p-value   |             | 0,1484      | >0,9999                          | 0,1289       |           | p-value   |             | 0,1094      | 0,625       | 0,9102      |
| 10-20 Gy                         | nCBV      | 1.65 ± 0.08 | 1.53 ± 0.10   | 1.52 ± 0.15 | 1.53 ± 0.08                      | 20-30 Gy | nCBV      | 1.09 ± 0.06 | 1.05 ± 0.07 | 1.03 ± 0.08                      | 1.03 ± 0.07  | 20-30 Gy  | nCBV      | 1.01 ± 0.03 | 0.99 ± 0.03 | 1.03 ± 0.03 | 1.00 ± 0.04 |
|                                  | ΔnCBV (%) |             | -7.5 ± 6.7    | -4.6 ± 13.7 | -6.1 ± 11.5                      |          | ΔnCBV (%) |             | -3.1 ± 7.5  | 3.0 ± 5.2                        | -4.2 ± 8.0   |           | ΔnCBV (%) |             | -1.3 ± 4.4  | 1.2 ± 5.5   | -0.9 ± 8.5  |
|                                  | p-value   |             | <b>0,0234</b> | 0,625       | 0,3008                           |          | p-value   |             | 0,3125      | 0,4375                           | 0,3008       |           | p-value   |             | 0,4609      | 0,625       | 0,9102      |
| 20-30 Gy                         | nCBV      | 1.64 ± 0.09 | 1.53 ± 0.11   | 1.51 ± 0.13 | 1.51 ± 0.09                      | 30-40 Gy | nCBV      | 1.14 ± 0.08 | 1.13 ± 0.09 | 1.06 ± 0.09                      | 1.09 ± 0.08  | 30-40 Gy  | nCBV      | 1.03 ± 0.03 | 1.02 ± 0.04 | 1.08 ± 0.04 | 1.03 ± 0.03 |
|                                  | ΔnCBV (%) |             | -7.3 ± 8.1    | -4.8 ± 12.3 | -6.6 ± 10.6                      |          | ΔnCBV (%) |             | -2.0 ± 6.3  | 4.4 ± 8.3                        | -1.8 ± 11.7  |           | ΔnCBV (%) |             | -0.8 ± 2.9  | 4.0 ± 7.6   | -0.2 ± 7.9  |
|                                  | p-value   |             | <b>0,0391</b> | 0,625       | 0,2031                           |          | p-value   |             | 0,4609      | 0,3125                           | >0,9999      |           | p-value   |             | 0,6406      | 0,3125      | 0,4961      |
| 30-40 Gy                         | nCBV      | 1.68 ± 0.10 | 1.58 ± 0.12   | 1.58 ± 0.14 | 1.55 ± 0.09                      | 40-50 Gy | nCBV      | 1.13 ± 0.08 | 1.08 ± 0.09 | 1.06 ± 0.09                      | 1.10 ± 0.09  | 40-50 Gy  | nCBV      | 0.99 ± 0.03 | 0.99 ± 0.03 | 1.02 ± 0.04 | 1.00 ± 0.04 |
|                                  | ΔnCBV (%) |             | -6.8 ± 6.8    | -2.0 ± 9.3  | -5.8 ± 9.6                       |          | ΔnCBV (%) |             | -3.9 ± 7.0  | 2.6 ± 10.1                       | -1.6 ± 11.5  |           | ΔnCBV (%) |             | 0.9 ± 5.1   | 4.4 ± 7.4   | 1.0 ± 5.0   |
|                                  | p-value   |             | <b>0,0391</b> | 0,8125      | 0,5703                           |          | p-value   |             | 0,1484      | 0,8125                           | 0,8203       |           | p-value   |             | 0,6406      | 0,3125      | 0,8203      |
| 40-50 Gy                         | nCBV      | 1.61 ± 0.09 | 1.53 ± 0.12   | 1.51 ± 0.15 | 1.51 ± 0.10                      | 50-60 Gy | nCBV      | 1.13 ± 0.08 | 1.05 ± 0.10 | 0.99 ± 0.13                      | 1.01 ± 0.10  | 50-60 Gy  | nCBV      | 0.95 ± 0.03 | 0.92 ± 0.04 | 0.94 ± 0.05 | 0.93 ± 0.04 |
|                                  | ΔnCBV (%) |             | -5.0 ± 7.3    | -1.6 ± 11.4 | -4.7 ± 7.6                       |          | ΔnCBV (%) |             | -9.1 ± 10.3 | -9.2 ± 21.2                      | -11.7 ± 19.9 |           | ΔnCBV (%) |             | -2.3 ± 5.8  | -0.8 ± 5.4  | -1.7 ± 7.0  |
|                                  | p-value   |             | 0,0781        | >0,9999     | 0,1289                           |          | p-value   |             | 0,0391      | 0,625                            | 0,1641       |           | p-value   |             | 0,5469      | 0,8125      | 0,8203      |
| 50-60 Gy                         | nCBV      | 1.54 ± 0.09 | 1.44 ± 0.12   | 1.38 ± 0.15 | 1.40 ± 0.09                      |          |           |             |             |                                  |              |           |           |             |             |             |             |
|                                  | ΔnCBV (%) |             | -8.3 ± 11.0   | -6.8 ± 15.5 | -7.2 ± 10.4                      |          |           |             |             |                                  |              |           |           |             |             |             |             |
|                                  | p-value   |             | 0,1484        | 0,625       | 0,0742                           |          |           |             |             |                                  |              |           |           |             |             |             |             |

  

| nCBF <sub>WM</sub> <sup>GM</sup> |           |             |             |              | nCBF <sub>WM</sub> <sup>WM</sup> |          |           |             |             | nCBF <sub>GM</sub> <sup>GM</sup> |             |           |           |             |             |             |             |
|----------------------------------|-----------|-------------|-------------|--------------|----------------------------------|----------|-----------|-------------|-------------|----------------------------------|-------------|-----------|-----------|-------------|-------------|-------------|-------------|
|                                  | Pre-RT    | Post-RT 1   | Post-RT 2   | Post-RT 3    |                                  | Pre-RT   | Post-RT 1 | Post-RT 2   | Post-RT 3   |                                  | Pre-RT      | Post-RT 1 | Post-RT 2 | Post-RT 3   |             |             |             |
| 0-5 Gy                           | nCBF      | 1.58 ± 0.07 | 1.50 ± 0.07 | 1.37 ± 0.10  | 1.44 ± 0.08                      | 5-10 Gy  | nCBF      | 1.05 ± 0.03 | 1.03 ± 0.03 | 0.99 ± 0.05                      | 1.00 ± 0.03 | 5-10 Gy   | nCBF      | 1.03 ± 0.02 | 1.02 ± 0.02 | 1.02 ± 0.02 | 1.03 ± 0.03 |
|                                  | ΔnCBF (%) |             | -5.3 ± 9.6  | -10.2 ± 11.6 | -7.3 ± 7.8                       |          | ΔnCBF (%) |             | -1.9 ± 6.3  | -4.6 ± 7.9                       | -2.8 ± 7.1  |           | ΔnCBF (%) |             | -0.9 ± 5.2  | -2.8 ± 4.6  | -1.0 ± 5.1  |
|                                  | p-value   |             | 0,1953      | 0,125        | <b>0,0273</b>                    |          | p-value   |             | 0,6406      | 0,625                            | 0,3594      |           | p-value   |             | 0,6406      | 0,1875      | 0,4258      |
| 5-10 Gy                          | nCBF      | 1.63 ± 0.06 | 1.54 ± 0.09 | 1.39 ± 0.11  | 1.48 ± 0.09                      | 10-20 Gy | nCBF      | 1.07 ± 0.05 | 1.04 ± 0.06 | 0.97 ± 0.08                      | 1.00 ± 0.05 | 10-20 Gy  | nCBF      | 1.03 ± 0.02 | 1.02 ± 0.02 | 1.03 ± 0.02 | 1.04 ± 0.02 |
|                                  | ΔnCBF (%) |             | -6.0 ± 13.3 | -13.2 ± 10.4 | -8.6 ± 9.6                       |          | ΔnCBF (%) |             | -2.8 ± 6.0  | -4.4 ± 10.4                      | -3.2 ± 6.1  |           | ΔnCBF (%) |             | -0.1 ± 4.3  | -1.6 ± 3.4  | 0.7 ± 3.0   |
|                                  | p-value   |             | 0,3828      | 0,125        | <b>0,0273</b>                    |          | p-value   |             | 0,1953      | 0,3125                           | 0,1289      |           | p-value   |             | 0,9453      | 0,3125      | 0,7344      |
| 10-20 Gy                         | nCBF      | 1.62 ± 0.08 | 1.54 ± 0.08 | 1.41 ± 0.12  | 1.49 ± 0.09                      | 20-30 Gy | nCBF      | 1.07 ± 0.06 | 1.07 ± 0.08 | 0.94 ± 0.08                      | 1.04 ± 0.07 | 20-30 Gy  | nCBF      | 1.02 ± 0.02 | 1.02 ± 0.02 | 1.01 ± 0.02 | 1.02 ± 0.03 |
|                                  | ΔnCBF (%) |             | -5.3 ± 11.9 | -11.8 ± 13.5 | -6.8 ± 7.9                       |          | ΔnCBF (%) |             | -1.5 ± 6.0  | -5.8 ± 7.7                       | -2.8 ± 8.3  |           | ΔnCBF (%) |             | 0.1 ± 5.4   | -3.0 ± 4.6  | 0.7 ± 3.9   |
|                                  | p-value   |             | 0,4609      | 0,125        | 0,0547                           |          | p-value   |             | 0,9453      | 0,1875                           | 0,8203      |           | p-value   |             | 0,7422      | 0,4375      | 0,6523      |
| 20-30 Gy                         | nCBF      | 1.61 ± 0.08 | 1.54 ± 0.10 | 1.38 ± 0.13  | 1.48 ± 0.09                      | 30-40 Gy | nCBF      | 1.15 ± 0.07 | 1.16 ± 0.10 | 0.98 ± 0.10                      | 1.12 ± 0.10 | 30-40 Gy  | nCBF      | 1.05 ± 0.02 | 1.05 ± 0.03 | 1.04 ± 0.03 | 1.05 ± 0.03 |
|                                  | ΔnCBF (%) |             | -5.1 ± 12.8 | -13.0 ± 12.8 | -6.8 ± 8.5                       |          | ΔnCBF (%) |             | -1.0 ± 5.4  | -5.6 ± 9.0                       | -1.3 ± 8.5  |           | ΔnCBF (%) |             | 0.4 ± 5.1   | -3.2 ± 5.7  | 0.0 ± 3.2   |
|                                  | p-value   |             | 0,4609      | 0,125        | <b>0,0273</b>                    |          | p-value   |             | 0,6406      | 0,3125                           | 0,9102      |           | p-value   |             | 0,7422      | 0,4375      | 0,8203      |
| 30-40 Gy                         | nCBF      | 1.66 ± 0.08 | 1.59 ± 0.10 | 1.43 ± 0.13  | 1.51 ± 0.09                      | 40-50 Gy | nCBF      | 1.13 ± 0.07 | 1.11 ± 0.10 | 0.97 ± 0.09                      | 1.11 ± 0.10 | 40-50 Gy  | nCBF      | 1.02 ± 0.02 | 1.03 ± 0.03 | 1.00 ± 0.03 | 1.01 ± 0.03 |
|                                  | ΔnCBF (%) |             | -4.8 ± 13.2 | -13.2 ± 10.9 | -7.3 ± 7.4                       |          | ΔnCBF (%) |             | -3.6 ± 6.1  | -7.2 ± 9.7                       | -1.3 ± 8.5  |           | ΔnCBF (%) |             | 1.0 ± 4.7   | -1.4 ± 7.2  | -0.4 ± 4.9  |
|                                  | p-value   |             | 0,4609      | 0,125        | <b>0,0195</b>                    |          | p-value   |             | 0,1094      | 0,1875                           | 0,6523      |           | p-value   |             | 0,3828      | 0,8125      | 0,9102      |
| 40-50 Gy                         | nCBF      | 1.62 ± 0.08 | 1.55 ± 0.10 | 1.38 ± 0.13  | 1.46 ± 0.10                      | 50-60 Gy | nCBF      | 1.10 ± 0.06 | 1.06 ± 0.11 | 0.89 ± 0.09                      | 1.03 ± 0.10 | 50-60 Gy  | nCBF      | 0.95 ± 0.02 | 0.94 ± 0.07 | 0.90 ± 0.04 | 0.95 ± 0.03 |
|                                  | ΔnCBF (%) |             | -4.1 ± 12.6 | -11.6 ± 14.6 | -7.9 ± 9.3                       |          | ΔnCBF (%) |             | -8.1 ± 13.5 | -17.0 ± 15.8                     | -8.7 ± 17.8 |           | ΔnCBF (%) |             | -0.1 ± 7.2  | -4.6 ± 3.5  | -0.1 ± 6.8  |
|                                  | p-value   |             | 0,4609      | 0,125        | 0,0742                           |          | p-value   |             | 0,1953      | 0,0625                           | 0,4258      |           | p-value   |             | 0,9453      | 0,0625      | >0,9999     |
| 50-60 Gy                         | nCBF      | 1.50 ± 0.08 | 1.43 ± 0.11 | 1.24 ± 0.12  | 1.37 ± 0.09                      |          |           |             |             |                                  |             |           |           |             |             |             |             |
|                                  | ΔnCBF (%) |             | -5.5 ± 13.6 | -14.8 ± 12.8 | -7.6 ± 9.2                       |          |           |             |             |                                  |             |           |           |             |             |             |             |
|                                  | p-value   |             | 0,4609      | 0,125        | 0,0742                           |          |           |             |             |                                  |             |           |           |             |             |             |             |
